# Supplementary material for: Structural Analysis of the Menangle Virus P Protein Reveals a Soft Boundary between Ordered and Disordered Regions
Source: MDPI journal article supplement (doi:10.3390/v13091737), 2021-08-31
Supplement: s1 [file s1]

Figure S1. Large zone SEC analysis of CC-L-BD. (A) The leading edge of a typical large zone elution profile for CC-L-BD (protein concentration in the plateau region = 45  $\mu\text{M}$ ). The midpoint of the leading edge was determined by numerical integration and used to compute a mass average partition coefficient for the protein (B) Mass average partition coefficients for protein CC-L-BD (hollow circles) as a function of plateau protein concentration. The solid line shows the predictions of a dimer-tetramer model (Eqns. 2-4, main text) with parameters  $\sigma_{P4}=0.22$ ,  $\sigma_{P2}=0.51$  and equilibrium dissociation constant  $K_D = 1/K_A = 0.058 \mu\text{M}$ .

**A**

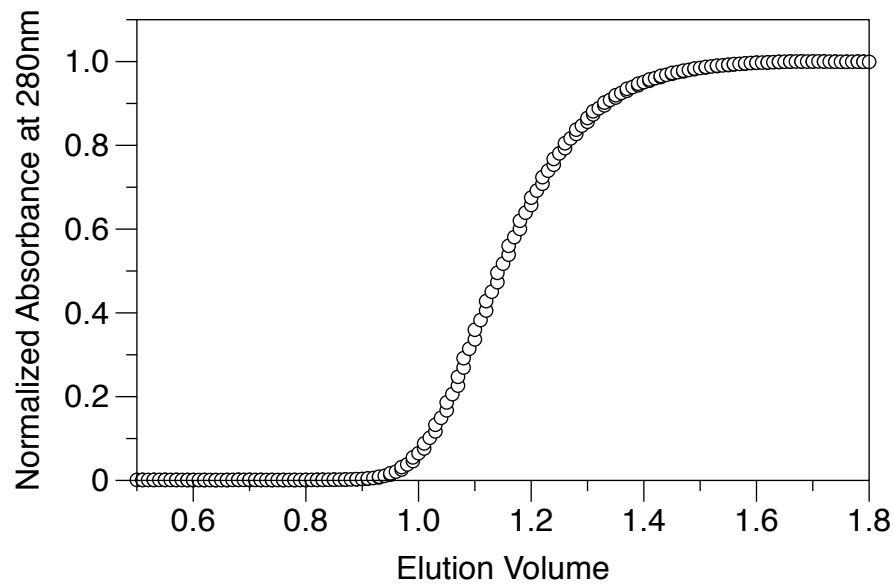

**B**

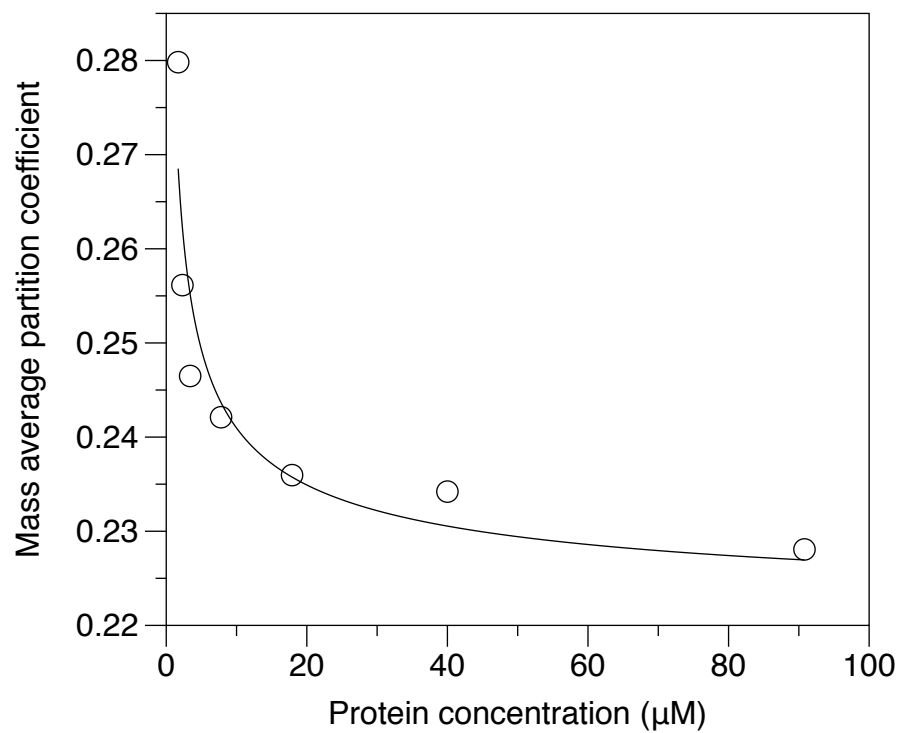

Figure S2. Relative estimates for the forward scattering intensity  $I(0)$  for proteins CC-L-BD, L-BD and BD, as a function of protein concentration. The estimates (hollow circles) were derived from Guinier analysis and are shown together with the least squares linear fit (solid lines).

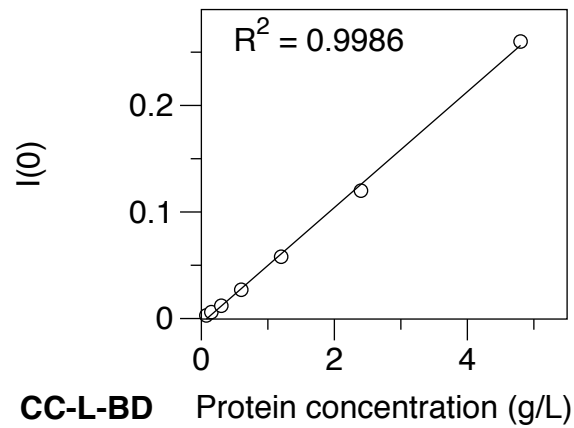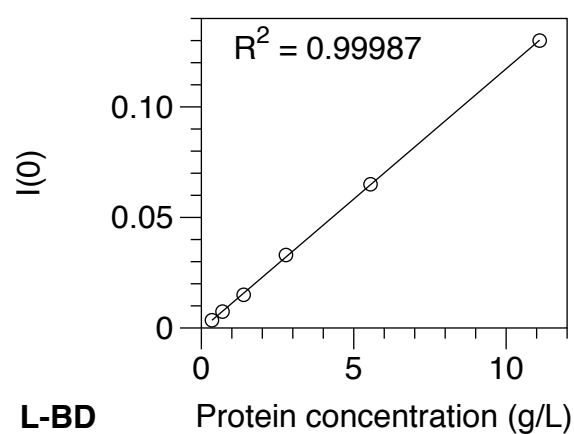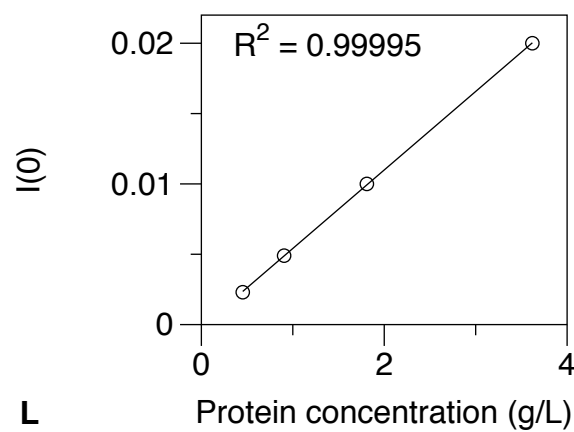

Figure S3. Multiple sequence alignment of the P protein from the *Ortho* and *Pararubulaviruses*. The alignment was performed using the Clustal Omega algorithm and results are displayed using BoxShade. Where there is more than 50% identity at a position in the alignment, black shading indicates the consensus residue, while grey shading indicates similarity to the consensus residue.

The abbreviations and the NCBI accession codes are as follows. **SV-41**: Simian virus 41 (NC\_006428); **HPIV-2**: Human parainfluenza virus 2 (NC\_003443); **PIV-5**: Parainfluenza virus 5 (NC\_006430); **MuV**: Mumps virus (NP\_054708); **PorPV**: Porcine rubulavirus (NC\_009640); **MapV**: Mapuera virus (NC\_009489); **HPIV-4b**: Human parainfluenza virus 4b (AB543337); **HPIV-4a**: Human parainfluenza virus 4a (NC\_021928); **ThkPV-3**: Tuhoko virus 3 (NC\_025350); **SosPV**: Sosuga virus (NC\_025343); **ThkPV-2**: Tuhoko virus 2 (NC\_025348); **AchPV-1**: Achimota virus 1 (NC\_025403); **ThkPV-1**: Tuhoko virus 1 (NC\_025410); **AchPV-2**: Achimota virus 2 (NC\_025404); **TioPV**: Tioman virus (NC\_004074); **TevPV**: Teviot virus (NC\_028233); **MenV**: Menangle virus (AF326114).

|         |    |                                                     |     |
|---------|----|-----------------------------------------------------|-----|
| SV-41   | 1  | -MAEPTTYTAEQVNDVVHAGLGVDFFLSRP-VDGQSSL--GKGSVPF--   | 44  |
| HPIV-2  | 1  | -MAEPTTYTTEQVDELTHAGLGVDFFLSRP-IDAQSSL--GKGSIPF--   | 44  |
| PIV-5   | 1  | MDPTDLSFSPDEINKLIETGLNTEVFYSQQ-VTGTSSL--GKNTIPF--   | 45  |
| MuV     | 1  | ---MDQFIKQDETGDLIETGMNVANHFLSAP-IQGTNSL--SKATTIP--  | 42  |
| PorPV   | 1  | MASSSLSFSDGETELLETGLGTIESIERMV-AAKGGPDGGIDPESQF--   | 47  |
| MapV    | 1  | ---MDLTFSPSEIDDLFGTGLDTIQFITDQK-SKQNDAGHSAKD-SPE--  | 43  |
| HPIV-4b | 1  | ---MSFEISVEEIDELIETGNLNIDYAKELGATSQPPP--NRPLSQISK   | 45  |
| HPIV-4a | 1  | ---MSFEISVEEIEELIETGNLNIDHAKELGATSQSSL--NRPPSQSSR   | 45  |
| ThkPV-3 | 1  | ---MEPTPSDAEISAWIERGLATAKHFAFNP-VSSQSSL--GKSTIKK--  | 42  |
| SosPV   | 1  | ---MDQPPSDAEISAWIERGLATARHFAPGP-VTSQSSL--GKSTIKK--  | 42  |
| ThkPV-2 | 1  | ---MDPSPSDEEISAWIDKGMDTVQHFVSOP-VNPOSSL--GKNTIKS--  | 42  |
| AchPV-1 | 1  | ---MDTNPSDEEISAWIDKGLDTHQHFVSGP-VTSQSSL--GKSTIKP--  | 42  |
| ThkPV-1 | 1  | ---MEISPSDEEINIMMDKALDTHQHFVSIP-VNPOSSL--GKNTIKK--  | 42  |
| AchPV-2 | 1  | ---MDTSPSDAEISAWIDKGLDTHQHFVTSQ-SGTPPQH--PRSQREPF-- | 42  |
| TioPV   | 1  | ---MDPSPSDAEISAWIDKGLDTHQHFVSLAS-TQSVRSL--GKSTIKP-- | 42  |
| TevPV   | 1  | ---MDASPSDAEISAWIDKGLDTHQHFVSLA-TPPVRS--GKSSIKP--   | 42  |
| MenV    | 1  | ---MDNPPSDAEISAWIDKGLDTHQHFVSLA-TDPAKSL--GKSTIKP--  | 42  |
|         |    |                                                     |     |
| SV-41   | 45 | --GITAVLTNAAEKAKTAAA-----APVKP                      | 68  |
| HPIV-2  | 45 | --GVTAVLTSAAEKSKPVAA-----GPVKP                      | 68  |
| PIV-5   | 46 | --GVTGLLTNAABAKIQESTN-----HQKGS-----VGGGAKPKK       | 79  |
| MuV     | 43 | --GVAPVLTEGNPEQKNIQYPTT-----SHQGS-----KSKGRGS-GA    | 76  |
| PorPV   | 48 | --GGRGLPTPTPTTSTPTAAGSASATLEL-----SPEGGAKKKA        | 85  |
| MapV    | 44 | --QTQNGPDSGSPS---DPTQV-----QGA-----KPKSHGIVP        | 72  |
| HPIV-4b | 46 | TEENNDETRISKNSASAEAPAHA-----S-SP                    | 71  |
| HPIV-4a | 46 | TEGNDGGTKISRNPAFVEAPAHT-----S-TA                    | 71  |
| ThkPV-3 | 43 | --GNTKVLVSSAEQIASSQPAASHTV-KVQAQVHPQOPTASQPCGAPK    | 89  |
| SosPV   | 43 | --GNTKQLVDSAEFTAATLAPAGGLQGSMPCSI---PAGQSKAGQAPK    | 87  |
| ThkPV-2 | 43 | --GNTKILIKSAEKKSKATKDNV---T-QESAPTPPPRDYQSEKKEVVRPK | 87  |
| AchPV-1 | 43 | --GNTRGLVKSASEKSMKLAKLAP--P-SSMQPAPPPREDQASSSGAPK   | 87  |
| ThkPV-1 | 43 | --GNTKSIKSAERKARAVPDHANAAPNATVEPATDRPYQTVQ-PVTKPK   | 89  |
| AchPV-2 | 43 | --QS-QGLQPSKPPRKQPEKQPPATT---PTRDPSLKKAPSKDPAPK     | 85  |
| TioPV   | 43 | --GNTGELVAAAEKVAANTAKGILSG---V-----RGTNPDPA         | 75  |
| TevPV   | 43 | --GNTGELISAAEKLVSNMEGITASS---P-----TMKGPDPA         | 75  |
| MenV    | 43 | --GKQQLIRSAEKLAVVQGGEGK---D-----RDNAKKEVTTAAPPA     | 83  |
|         |    |                                                     |     |
| SV-41   | 69 | KRKKIQHMTPAYTIADNGDPRNLPANTPIANPLIPIRPPGRMTDLDL--   | 116 |
| HPIV-2  | 69 | RRKKVISNTPYTIADNIPPEKLPINTPIPNPLPLARPHGKMTDIDI--    | 116 |
| PIV-5   | 80 | RPKI-----AIVPADDKTVPGKPIPNPLGLDSTFSTQTVLVL--        | 117 |
| MuV     | 77 | RP-----IIVSSSEGTVGGTVPEPLFAQTGGGGIVTTVYQ--          | 112 |
| PorPV   | 86 | PR-----AHPTLENPLGQEEPRGNPLSTFTFVRGSSSTHDP--         | 121 |
| MapV    | 73 | IP-----TAPPVETARHPGSRVDDPLVLDYPRRGKVITHEP--         | 108 |
| HPIV-4b | 72 | LRSR-----NEESEPGKQSSDGFMSISNRFPQTGMLLMGSD           | 106 |
| HPIV-4a | 72 | QRSH-----NEENESGRQNLDSLMSISNKPQTGMLLMGSD            | 106 |
| ThkPV-3 | 90 | TKRTATPA-----FTPSVQQAVKIEPV-YEDIVSNPTHQ--A--        | 123 |
| SosPV   | 88 | VKKAQTR-----ATPTKPDAPTIEPV-YEDIVSTPGRD--K--         | 121 |
| ThkPV-2 | 88 | IRKTQGER-----PRPLPPIPQEEESI-YEEVSREVVEEDQP--        | 123 |
| AchPV-1 | 88 | SKKSVSFQ-----KPQASQSVISDDAI-YEEVIRPDNDEFQP--        | 123 |
| ThkPV-1 | 90 | QPRKARALPCP-----SSAPVPVPRVSEFPQEEP-YEEVGAPAQEDTPL-- | 131 |
| AchPV-2 | 86 | QLSTVRFQ-----EGVTVAPCGPEDSI-YEEVIPGGSTCAGQ--        | 121 |
| TioPV   | 76 | TRPKKQK-----GSPVKMQHQEQESV-YEEVIPTESAPLIP--         | 111 |
| TevPV   | 76 | VRPKERTK-----EPQDNAQNEQNDI-YEEVIPSESATLIP--         | 111 |
| MenV    | 84 | VRGKVR-----PIDVEPSDNT-YEEVIPSENSKLIP--              | 113 |

Figure S3 (continued)

|         |     |           |        |        |       |      |        |        |         |        |       |      |      |      |      |      |     |     |     |     |     |     |     |   |     |     |   |     |   |   |   |   |     |   |     |   |     |     |     |     |   |     |   |     |
|---------|-----|-----------|--------|--------|-------|------|--------|--------|---------|--------|-------|------|------|------|------|------|-----|-----|-----|-----|-----|-----|-----|---|-----|-----|---|-----|---|---|---|---|-----|---|-----|---|-----|-----|-----|-----|---|-----|---|-----|
| SV-41   | 117 | ATGTVTQGT | YKGV   | ELAK   | GK    | NALL | TRFSS  | GP     | SL--    | TDQASS | KDPN  | F    | KRGG | 164  |      |      |     |     |     |     |     |     |     |   |     |     |   |     |   |   |   |   |     |   |     |   |     |     |     |     |   |     |   |     |
| HPIV-2  | 117 | VTGNITEG  | SYKGV  | ELAK   | LK    | QTL  | LRFTS  | NEPV-- | SSAGSA  | QDPN   | F     | KRGG | 164  |      |      |      |     |     |     |     |     |     |     |   |     |     |   |     |   |   |   |   |     |   |     |   |     |     |     |     |   |     |   |     |
| PIV-5   | 118 | SGKTL     | PSGS   | YKGV   | KLAK  | FK   | ENLM   | TRFIEE | PRE--   | NPIAT  | SSPID | F    | KRGA | 165  |      |      |     |     |     |     |     |     |     |   |     |     |   |     |   |   |   |   |     |   |     |   |     |     |     |     |   |     |   |     |
| MuV     | 113 | DPTIQ     | PTGS   | YRSV   | ELAK  | IG   | KERMIN | RFVEK  | PRT--   | ST---- | PVTE  | F    | KRGG | 156  |      |      |     |     |     |     |     |     |     |   |     |     |   |     |   |   |   |   |     |   |     |   |     |     |     |     |   |     |   |     |
| PorPV   | 122 | LPGSR     | PGSE   | VEYEG  | DLMAR | AR   | SELV   | TRWS   | DEEGD-- | PVPTR  | VLQST | F    | KRGG | 169  |      |      |     |     |     |     |     |     |     |   |     |     |   |     |   |   |   |   |     |   |     |   |     |     |     |     |   |     |   |     |
| MapV    | 109 | KESSQAD   | GYEY   | DSYLA  | QNAK  | TN   | ILKR   | WTDV   | SGD--   | VEPI   | PMNP  | EV   | F    | KRGG | 156  |      |     |     |     |     |     |     |     |   |     |     |   |     |   |   |   |   |     |   |     |   |     |     |     |     |   |     |   |     |
| HPIV-4b | 107 | TQSPSP    | SKTY   | QGLI-- | LD    | AK   | KRAL   | NEPR   | RQK     | ITNE   | HGNT  | NDT  | W    | F    | KRGG | 154  |     |     |     |     |     |     |     |   |     |     |   |     |   |   |   |   |     |   |     |   |     |     |     |     |   |     |   |     |
| HPIV-4a | 107 | TQLPSP    | SKTY   | QGLI-- | LD    | AK   | KRAL   | NEPR   | RDQ     | KITNE  | HGSM  | NDT  | R    | F    | KRGG | 154  |     |     |     |     |     |     |     |   |     |     |   |     |   |   |   |   |     |   |     |   |     |     |     |     |   |     |   |     |
| ThkPV-3 | 124 | ENAPLI    | -----  | ATQSS  | AK    | QSL  | LLCTE  | PLPS   | QP--    | SSAT   | RCGE  | QS   | F    | KRGG | 164  |      |     |     |     |     |     |     |     |   |     |     |   |     |   |   |   |   |     |   |     |   |     |     |     |     |   |     |   |     |
| SosPV   | 122 | AQVQL     | -----  | SPKLS  | AK    | KLL  | SAP    | PLQ    | QHS--   | NIPT   | GP    | EGQ  | F    | KRGG | 162  |      |     |     |     |     |     |     |     |   |     |     |   |     |   |   |   |   |     |   |     |   |     |     |     |     |   |     |   |     |
| ThkPV-2 | 124 | LLQOO     | -----  | AHVLK  | GK    | KIL  | STSP   | VNQ    | EP--    | DLPT   | GP    | GGQ  | F    | KRGG | 164  |      |     |     |     |     |     |     |     |   |     |     |   |     |   |   |   |   |     |   |     |   |     |     |     |     |   |     |   |     |
| AchPV-1 | 124 | LLQKSP    | -----  | SPEQK  | AK    | DR   | LLNT   | VIM    | GDH     | Q--    | PPST  | SHSG | Q    | F    | KRGG | 164  |     |     |     |     |     |     |     |   |     |     |   |     |   |   |   |   |     |   |     |   |     |     |     |     |   |     |   |     |
| ThkPV-1 | 132 | LKQAVP    | -----  | QSPSS  | GK    | LSS  | QLP    | PLD    | NSND    | SSNP   | SLSD  | Q    | N    | F    | KRGA | 174  |     |     |     |     |     |     |     |   |     |     |   |     |   |   |   |   |     |   |     |   |     |     |     |     |   |     |   |     |
| AchPV-2 | 122 | KQPGKD    | -----  | DRKTK  | AK    | NR   | ILSM   | QVDD   | TVV--   | GGVD   | QGM   | PSH  | F    | KRGG | 162  |      |     |     |     |     |     |     |     |   |     |     |   |     |   |   |   |   |     |   |     |   |     |     |     |     |   |     |   |     |
| TioPV   | 112 | KTT--P    | -----  | KKPPRN | KE    | KVM  | SMM    | AL     | SPPD--  | ESLD   | ETHE  | AV   | F    | KRGG | 150  |      |     |     |     |     |     |     |     |   |     |     |   |     |   |   |   |   |     |   |     |   |     |     |     |     |   |     |   |     |
| TevPV   | 112 | KSA--P    | -----  | KKPSRN | KE    | KVM  | SMM    | AL     | SPPD--  | DNSA   | KEK   | PSV  | F    | KRGG | 150  |      |     |     |     |     |     |     |     |   |     |     |   |     |   |   |   |   |     |   |     |   |     |     |     |     |   |     |   |     |
| MenV    | 114 | PVT--P    | -----  | KKPPRH | KD    | RIM  | SMM    | PLQ    | SDK--   | QLTES  | MES   | QV   | F    | KRGG | 152  |      |     |     |     |     |     |     |     |   |     |     |   |     |   |   |   |   |     |   |     |   |     |     |     |     |   |     |   |     |
| SV-41   | 165 | EKLT----- | DATKAD | TG     | SGA   | SP   | GSET   | KLRF   | MS      | GA     | IQ    | HVP  | Q    | 200  |      |      |     |     |     |     |     |     |     |   |     |     |   |     |   |   |   |   |     |   |     |   |     |     |     |     |   |     |   |     |
| HPIV-2  | 165 | ELIE----- | KEQEAT | IG     | ENV   | LHC  | SEIR   | SK     | SS      | QV     | IP    | GV   | P    | Q    | 200  |      |     |     |     |     |     |     |     |   |     |     |   |     |   |   |   |   |     |   |     |   |     |     |     |     |   |     |   |     |
| PIV-5   | 166 | GIPA----- | -----  | GS     | EG    | STO  | SDG    | WEM    | KSR     | SL     | GA    | HP   | V    | L    | Q    | 197  |     |     |     |     |     |     |     |   |     |     |   |     |   |   |   |   |     |   |     |   |     |     |     |     |   |     |   |     |
| MuV     | 157 | PGAAAQ    | -----  | GQTI   | QEEG  | LD   | NGAS   | SAGS   | KERS    | SG     | SL    | GA   | TP   | Y    | AHL  | 196  |     |     |     |     |     |     |     |   |     |     |   |     |   |   |   |   |     |   |     |   |     |     |     |     |   |     |   |     |
| PorPV   | 170 | PTGKEL    | -----  | IPAN   | QATV  | EN   | IAS    | GG     | SV      | GP     | SG    | SS   | NG   | AT   | QHVP | Q    | 207 |     |     |     |     |     |     |   |     |     |   |     |   |   |   |   |     |   |     |   |     |     |     |     |   |     |   |     |
| MapV    | 157 | QTSFSP    | -----  | QIPI   | QVIA  | ENG  | ALG    | GGL    | QQ      | QSR    | SW    | SG   | AT   | FP   | PAL  | Q    | 194 |     |     |     |     |     |     |   |     |     |   |     |   |   |   |   |     |   |     |   |     |     |     |     |   |     |   |     |
| HPIV-4b | 155 | NIATKKE   | AWVTQ  | NORS   | KIQ   | SSF  | QD     | EST    | RFH     | GS     | ME    | EP   | QY   | QS   | GA   | HVAH | Q   | 204 |     |     |     |     |     |   |     |     |   |     |   |   |   |   |     |   |     |   |     |     |     |     |   |     |   |     |
| HPIV-4a | 155 | NIDTRKE   | AWVTQ  | NORS   | RTQ   | PP   | LD     | EST    | RFH     | GL     | TE    | EP   | QY   | PS   | GA   | HAAH | Q   | 204 |     |     |     |     |     |   |     |     |   |     |   |   |   |   |     |   |     |   |     |     |     |     |   |     |   |     |
| ThkPV-3 | 165 | DFLPVP    | -----  | PGRD   | PTV   | QD   | TDEN   | LILF   | GAQ     | ENLR   | SE    | NG   | AT   | Q    | PA   | P    | Q   | 206 |     |     |     |     |     |   |     |     |   |     |   |   |   |   |     |   |     |   |     |     |     |     |   |     |   |     |
| SosPV   | 163 | CPQEAP    | -----  | PLLE   | ETPI  | QD   | TDE    | SS     | ILY     | CEED   | HS    | QC   | ES   | GA   | IQ   | PAV  | Q   | 204 |     |     |     |     |     |   |     |     |   |     |   |   |   |   |     |   |     |   |     |     |     |     |   |     |   |     |
| ThkPV-2 | 165 | LGLISQ    | -----  | QOD    | SS    | TYD  | QG     | DES    | LT      | SD     | GM    | ATN  | VLE  | SG   | AT   | LA   | V   | P   | Q   | 206 |     |     |     |   |     |     |   |     |   |   |   |   |     |   |     |   |     |     |     |     |   |     |   |     |
| AchPV-1 | 165 | FGVTGV    | -----  | QQQV   | QNS   | RDA  | IG     | ES     | L       | LD     | G     | LE   | ED   | PM   | SV   | NG   | AT  | PY  | V   | P   | Q   | 206 |     |   |     |     |   |     |   |   |   |   |     |   |     |   |     |     |     |     |   |     |   |     |
| ThkPV-1 | 175 | YPRVPD    | -----  | GMN    | KKL   | HVT  | CE     | SS     | TL      | SG     | V     | GA   | V    | QS   | SL   | GA   | T   | Q   | S   | A   | P   | Q   | 214 |   |     |     |   |     |   |   |   |   |     |   |     |   |     |     |     |     |   |     |   |     |
| AchPV-2 | 163 | DTASMS    | -----  | ALK    | GSG   | IA   | IENT   | PS     | IGA     | QA     | ALES  | SS   | SG   | AT   | QA   | V    | S   | Q   | 202 |     |     |     |     |   |     |     |   |     |   |   |   |   |     |   |     |   |     |     |     |     |   |     |   |     |
| TioPV   | 151 | VPPPHG    | -----  | RGAT   | QG    | GD   | TG     | GK     | SP      | SAG    | Q     | PE   | PR   | GS   | ONG  | AT   | QY  | V   | T   | Q   | 190 |     |     |   |     |     |   |     |   |   |   |   |     |   |     |   |     |     |     |     |   |     |   |     |
| TevPV   | 151 | IPPPHG    | -----  | PAAT   | D     | K    | GAT    | GGR    | LOS     | SAG    | Q     | Q    | G    | S    | HE   | ONG  | AT  | QY  | V   | T   | Q   | 190 |     |   |     |     |   |     |   |   |   |   |     |   |     |   |     |     |     |     |   |     |   |     |
| MenV    | 153 | KDLRHG    | -----  | PSD    | I     | G    | PA     | H      | GGR     | S      | Q     | L    | T    | G    | LAG  | GR   | S   | Q   | GA  | T   | QY  | V   | T   | Q | 192 |     |   |     |   |   |   |   |     |   |     |   |     |     |     |     |   |     |   |     |
| SV-41   | 201 | LLPLTASS  | PVL    | VE     | PA    | FI   | GA     | EN     | VKE     | IE     | IL    | RCL  | DL   | R    | MS   | LE   | GK  | V   | D   | K   | I   | L   | A   | T | S   | 250 |   |     |   |   |   |   |     |   |     |   |     |     |     |     |   |     |   |     |
| HPIV-2  | 201 | SRPOLASS  | PAHAD  | PAP    | AS    | AE   | NVKE   | IE     | ELL     | KGL    | DL    | RL   | Q    | T    | VE   | GK   | V   | D   | K   | I   | L   | A   | T   | S | 250 |     |   |     |   |   |   |   |     |   |     |   |     |     |     |     |   |     |   |     |
| PIV-5   | 198 | SPLQQGD   | LNALV  | TSV    | QSL   | AL   | NVNE   | IL     | NTV     | R      | N     | LDS  | R    | M    | N    | O    | L   | E   | T   | K   | V   | D   | R   | I | L   | S   | Q | 247 |   |   |   |   |     |   |     |   |     |     |     |     |   |     |   |     |
| MuV     | 197 | SLPQQD    | STFAN  | VGI    | AP    | QSA  | ISANE  | IM     | DLR     | G      | M     | DAR  | LQ   | H    | L    | E    | Q   | K   | V   | D   | R   | V   | L   | A | G   | 246 |   |     |   |   |   |   |     |   |     |   |     |     |     |     |   |     |   |     |
| PorPV   | 208 | YPWNQD    | TNAPV  | AP     | AP    | QSA  | LN     | VPE    | IM      | ELL    | KAI   | EGR  | M    | MA   | L    | E    | M   | K   | V   | D   | R   | V   | L   | A | G   | 257 |   |     |   |   |   |   |     |   |     |   |     |     |     |     |   |     |   |     |
| MapV    | 195 | LQOH      | PD     | T      | M     | N    | V      | SE     | AL      | R      | S     | AP   | D    | SE   | IM   | D    | M   | L   | R   | R   | L   | D   | AR  | I | G   | S   | V | E   | A | K | M | D | R   | I | L   | A | V   | 244 |     |     |   |     |   |     |
| HPIV-4b | 205 | SNQLP     | PS     | K      | N     | V    | SE     | D      | V       | K      | F     | A    | N    | Y    | A    | E    | I   | L   | D   | A   | K   | A   | L   | E | V   | R   | L | D   | R | I | E | G | K   | V | D   | K | I   | M   | L   | T   | Q | 254 |   |     |
| HPIV-4a | 205 | SNQLP     | PS     | K      | N     | V    | SE     | D      | V       | K      | F     | A    | N    | Y    | A    | E    | I   | L   | D   | A   | K   | A   | L   | E | V   | R   | L | D   | R | I | E | G | K   | V | D   | K | I   | M   | L   | T   | Q | 254 |   |     |
| ThkPV-3 | 207 | SLQSP     | ED     | IS     | AV    | GN   | ALES   | ANS    | VRE     | I      | RY    | L    | V    | M    | E    | A    | K   | M   | T   | Q   | L   | E   | W   | K | V   | D   | K | V   | L | A | Q | N | 256 |   |     |   |     |     |     |     |   |     |   |     |
| SosPV   | 205 | SHQSP     | G      | D      | I     | AD   | V      | S      | ALES    | ANS    | VKE   | I    | RY   | L    | V    | M    | E   | N   | K   | M   | N   | O   | L   | E | W   | K   | I | D   | R | V | L | A | Q   | N | 254 |   |     |     |     |     |   |     |   |     |
| ThkPV-2 | 207 | SDQLQ     | C      | D      | I     | F    | AL     | V      | ENAL    | Q      | S     | AP   | C    | VKE  | I    | RY   | L   | R   | V   | L   | E   | N   | R   | F | N   | Q   | M | E   | S | K | I | D | K   | I | I   | S | H   | Q   | 256 |     |   |     |   |     |
| AchPV-1 | 207 | SLQSH     | G      | D      | L     | H    | AA     | V      | ETAL    | M      | S     | AP   | C    | VRE  | I    | RY   | L   | K   | L   | E   | N   | R   | F   | N | Q   | M   | D | W   | K | L | D | K | L   | I | G   | Q | 256 |     |     |     |   |     |   |     |
| ThkPV-1 | 215 | SLPIQ     | D      | D      | N     | P    | V      | G      | A       | D      | A     | Q    | V    | F    | ANS  | VKE  | I   | T   | I   | L   | Q   | G   | M   | E | A   | R   | M | S   | Q | L | E | W | K   | V | D   | K | L   | A   | Q   | 264 |   |     |   |     |
| AchPV-2 | 203 | LQIQE     | Q      | E      | S     | P    | V      | D      | V       | AT     | V     | E    | L    | A    | P    | C    | VKE | I   | RY  | L   | V   | I   | E   | T | R   | M   | T | Q   | L | E | W | K | V   | D | K   | I | I   | G   | Q   | 252 |   |     |   |     |
| TioPV   | 191 | YPNS      | P      | T      | G     | E    | P      | A      | G       | A      | V     | Q    | M    | S    | A    | P    | C   | VRE | I   | M   | H   | Y   | L   | O | T   | L   | E | T   | R | I | N | L | D   | W | K   | V | D   | K   | L   | S   | Q | 240 |   |     |
| TevPV   | 191 | YLN       | P      | R      | T     | E    | D      | V      | G       | A      | D     | S    | A    | Q    | M    | S    | A   | L   | C   | VRE | I   | M   | H   | Y | L   | O   | T | L   | E | T | R | I | N   | L | D   | W | K   | V   | D   | K   | L | S   | Q | 240 |
| MenV    | 193 | SPS       | Q      | P      | S     | E    | V      | A      | D       | V      | E     | T    | A    | P    | A    | S    | A   | P   | V   | VKE | I   | H   | Y   | L | O   | T   | L | E   | T | R | I | N | N   | L | D   | W | K   | V   | D   | K   | L | S   | Q | 242 |

Figure S3 (continued)

|         |     |               |                 |                           |              |              |                        |
|---------|-----|---------------|-----------------|---------------------------|--------------|--------------|------------------------|
| SV-41   | 251 | ATITALKNEVTS  | LKANVATVEGMMTT  | MKIMDPSTPTNVPVEKIR        | KNL          | KDT          | 300                    |
| HPIV-2  | 251 | ATITNLKNEMTS  | LKASVATMEGMITT  | MKIMDPSTPTNVPVEEIR        | KS           | LHN          | 300                    |
| PIV-5   | 248 | SLLOTIKNDIV   | LKAGMATLEGMITT  | MKIMDPGVPSNVTVEDVR        | KT           | LSNH         | 297                    |
| MuV     | 247 | SMVTOIKNELST  | VKTTLATIEGMMAT  | MKIMDPGNPAGVVPVDELRRS     | F            | SDH          | 296                    |
| PorPV   | 258 | SVLTQIKNEVTT  | LKATTATIEGLITT  | VRIMDPGVPSNMTAQIARNOIAEV  |              |              | 307                    |
| MapV    | 245 | ATVNQIKNEVSS  | LKSITATIEGMITT  | VRIMDPGTPSHMSATEVRRQLSDV  |              |              | 294                    |
| HPIV-4b | 255 | NTIQOTKNDTQO  | IKGSLATIEGLITT  | MKIMDPGVPSKVSLSRLNKGPEOV  |              |              | 304                    |
| HPIV-4a | 255 | NTIQOTKNDTQO  | IKGSLATIEGLITT  | MKIMDPGVPSKVSLSRLNKESEOV  |              |              | 304                    |
| ThkPV-3 | 257 | SLIQOVRNEOL   | VLKASMATIEGLMTT | MKIMDPGVGPGATAAQAARLFKEA  |              |              | 306                    |
| SosPV   | 255 | NILQOIRNEOM   | VLKAGMATIEGLITT | MKIMDPGVGPGADAAQAARAFKDV  |              |              | 304                    |
| ThkPV-2 | 257 | NILTOIRNEOL   | GLKASAMLEGMITT  | MKIMDPGVGPGATAAQAARLFKEV  |              |              | 306                    |
| AchPV-1 | 257 | STITQIRNEOM   | GLKANMAMIEGLITS | MKIMDPGVGPGANAAQAARLFKEV  |              |              | 306                    |
| ThkPV-1 | 265 | STITQIRNEOM   | VALKAQMATIEGLAT | MKIMDPGAVSSTTANQAARLFKTES |              |              | 314                    |
| AchPV-2 | 253 | NMIQOIRNDOT   | ALKANMATIEGLITT | MKIMDPGVPSNNASQVKKLFKES   |              |              | 302                    |
| TioPV   | 241 | TTITQIKNDQHT  | IKASLATIEGLITT  | MKIMDPGVGPGATASQAARLFKEA  |              |              | 290                    |
| TevPV   | 241 | STITQIKNDQHT  | IKASLATIEGLITT  | MKIMDPGVGPGATAAQAARLFKEV  |              |              | 290                    |
| MenV    | 243 | SVITQIKHEQHAT | KAGLATIEGLITT   | MKIMDPGVGPGATAAKSKRLFKEA  |              |              | 292                    |
|         |     |               |                 |                           |              |              |                        |
| SV-41   | 301 | PVVISGPI      | LSSEHITGSDM     | IVDELARP                  | SLSTKKIV     | -RRPEPKD     | -LTG 348               |
| HPIV-2  | 301 | PVVHAGPTS     | GGTAEQVILIS     | MDELARP                   | TLSTKRIT     | -RKPEKKD     | -LTG 348               |
| PIV-5   | 298 | AVVVPESFNS    | DLTQSEDVIS      | LDELARP                   | TATSVKKIV    | -RKVPPQKD    | -LTG 344               |
| MuV     | 297 | VTVVSGPGDVS   | FSSGEEPTLV      | LDELARP                   | VPKPRPAKQ    | -PKPQPVKD    | -LAG 345               |
| PorPV   | 308 | PLIVTGGPGVP   | VPQYKRDITL      | IVDELARP                  | SIAPLPAAQTQK | PAPAKQATDG   | 357                    |
| MapV    | 295 | PLVTSGGPGVP   | QLDPRRDLIA      | LDELARP                   | KVVQSPPVAS   | PAPSMASQLSDG | 344                    |
| HPIV-4b | 305 | PIIVTGTG      | DVSKFVDQDNTIT   | LDPLARP                   | ILSGTKQIT    | -DERRAGVR    | -IDA 352               |
| HPIV-4a | 305 | PIIVTGTG      | DVSKFVDQDNTIT   | LDPLARP                   | ILSGTKQIT    | -DERRAGVR    | -IDA 352               |
| ThkPV-3 | 307 | PVVVSGPIV     | CDNLI           | FEDKLEISSLGK              | PKVAPQPKK    | -RLVTSEAD    | -IAG 354               |
| SosPV   | 305 | PVVVSGP       | VICENDLIFE      | SKLEVGNLGR                | PKVNPTPRR    | -RGVPTSE     | -LAS 352               |
| ThkPV-2 | 307 | PVVTSGN       | SVGATEL         | TEAAELEIQDLGR             | PIVQQTPKK    | -RAVVGDS     | -LAS 354               |
| AchPV-1 | 307 | PVVTSGP       | VVGENPLVT       | ATELEIQDLGK               | PAIPSKGSSK   | -KAGLTEAD    | -LAG 354               |
| ThkPV-1 | 315 | CVVVS         | GPTGDL          | ELTKAKELF                 | IGDLGTP      | TPNPPPPQ     | PQ-PAQSDSRE -LAG 362   |
| AchPV-2 | 303 | PVVTS         | GPCSADNPLIS     | AGSLQ                     | LDELARPSIPT  | TMAKK        | -KQVSTDS -ISG 350      |
| TioPV   | 291 | PVVTS         | GPILGDNPI       | IGAEAL                    | HDELARPSPAK  | PROVK        | -QSGPSSA -IVG 338      |
| TevPV   | 291 | PVVTS         | GPILGENQ        | VIHADT                    | HDELARPSPAK  | GKQAK        | -TASPNNPA -VIG 338     |
| MenV    | 293 | PVVVS         | GPVIGDNPI       | VDADT                     | HDELARPSLP   | KTKSQK       | -SSAASPAA -LSC 340     |
|         |     |               |                 |                           |              |              |                        |
| SV-41   | 349 | MKLML         | LIQLANDCMGK     | PDQKAEIVAK                | HAATR        | EAQLLDIKRS   | IIKSAI - 395           |
| HPIV-2  | 349 | IKLTL         | MLQANDCIS       | RPDTKTE                   | VTKTQAAT     | TESQLNEIKRS  | IIIRSAI - 395          |
| PIV-5   | 346 | LKLTLE        | QAKDCISKPK      | MREEYLLKNQ                | ASSBAQLID    | LKKAIIRSAI   | - 392                  |
| MuV     | 345 | RKVMIT        | KMITD           | CANPQMKQV                 | TEORLAKAS    | TEDALNDIKR   | DIIRSAI - 391          |
| PorPV   | 358 | ARLMVSR       | MISSCVT         | NDSARKRFEAR               | LGSCTMDQIQ   | ALKNDVIR     | VAS - 404              |
| MapV    | 345 | TRIMTL        | QMIKECVSD       | LEQSR                     | ETKLSCT      | EDQGA        | IKMEILRRAT - 391       |
| HPIV-4b | 353 | LKITVSE       | MI              | IRDLFGDCDKSR              | KLLESINMAT   | TEODIN       | SIKTNALRSIT - 399      |
| HPIV-4a | 353 | LKITVSE       | MI              | IRDLFGDCDKSR              | KLLESINMAT   | TEODIN       | LIKTNALRSIT - 399      |
| ThkPV-3 | 355 | YKLT          | TLTKLKECT       | PNANQHKKE                 | EDLASVKN     | ESDFKA       | AKREIVRAAI - 401       |
| SosPV   | 353 | YKLT          | LAKLKD          | CIPNNTAQSK                | FLDATEKIK    | TEADFK       | ALKREIVRAAV - 399      |
| ThkPV-2 | 355 | YKLT          | LKKNLAK         | DCIPNAHIOAE               | EDKKSSIRSE   | NDFKKIK      | REILRRAT - 401         |
| AchPV-1 | 355 | YKMT          | LMTLIKDC        | IPNASMQOE                 | FERRVNQIK    | NEVDFK       | ALKREILRAAV - 401      |
| ThkPV-1 | 363 | YKMT          | LNM             | LAKDCIPNSQOR              | QPELKKETIK   | SEODFK       | KLKREILRAAV - 409      |
| AchPV-2 | 351 | YRLT          | LITLISDC        | IONPIQOOT                 | PEKKAGLVK    | TEOEFK       | KLKREILRAAV - 397      |
| TioPV   | 339 | YKST          | LOS             | LVKECISNPS                | MROKFDLA     | SNIKSE       | ODFKQVRRDIIRSAT - 385  |
| TevPV   | 339 | YRST          | LOS             | LVKECISNPS                | MROKFDVA     | INSVKTE      | ODFKQVRRDIIRSAT - 385  |
| MenV    | 341 | YKMT          | L               | LALIKECT                  | IPNAKROK     | TEMQVGGIR    | NEODFKNLREIIRSAQ - 388 |

Figure S4. Secondary structure propensities for the linker sequence (residues 268-330) (A) Predicted by the algorithm GOR IV from the full length MenV P sequence. (B) Predicted by the algorithm ncSPC (neighbor-corrected Structural Propensity Calculator) based on solution NMR chemical shifts of MenV P<sub>267-388</sub> (pH 7, 10 °C). ncSPC scores of 1.0 and – 1.0 would reflect fully formed  $\alpha$ - or  $\beta$ -structure, respectively.

**A**

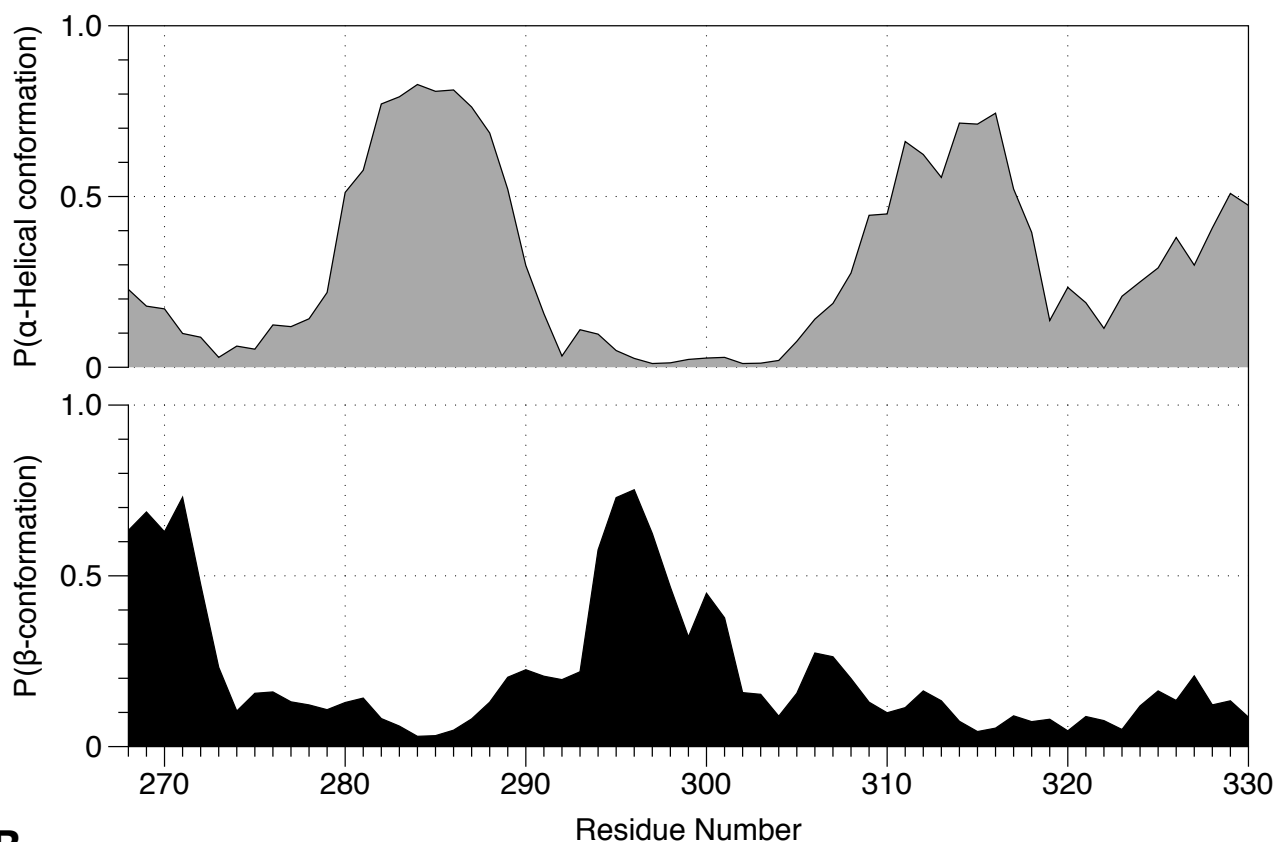

**B**

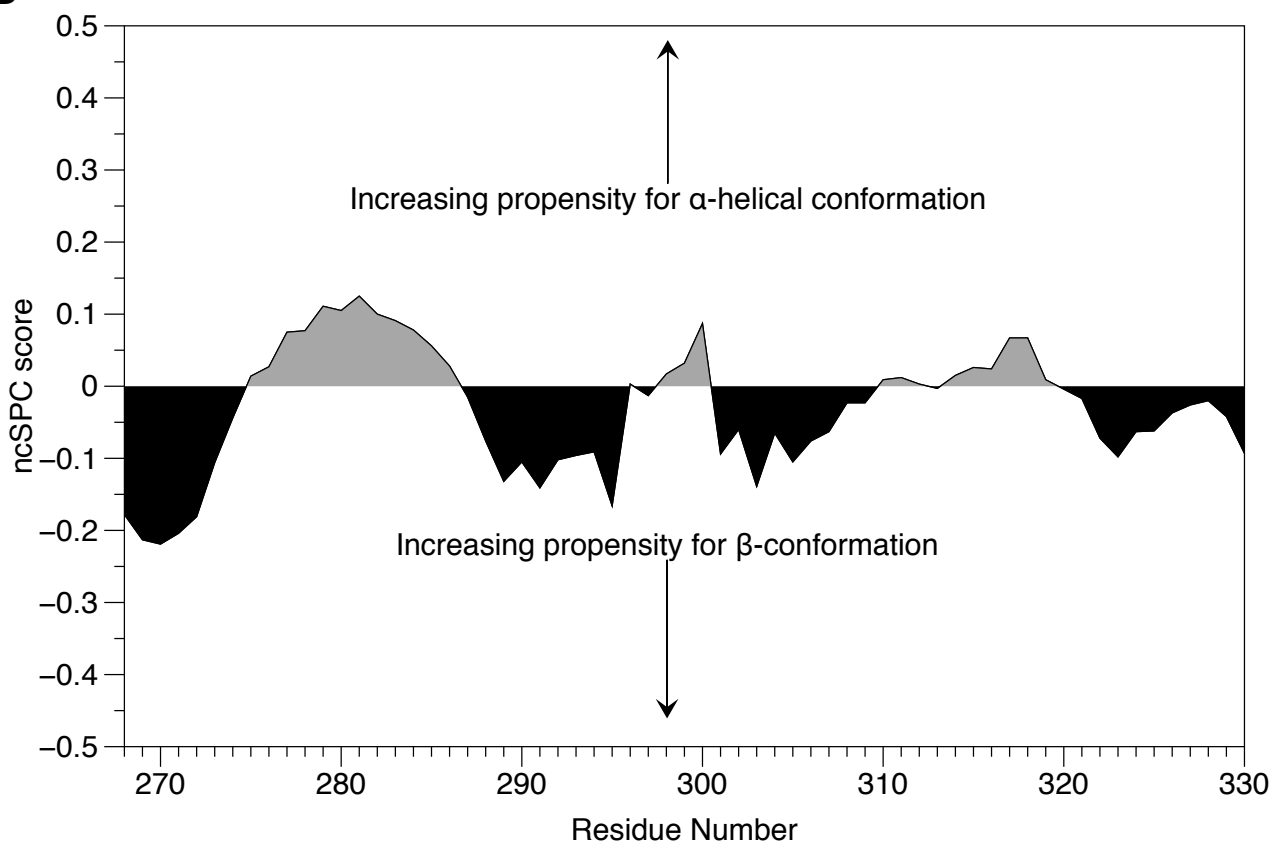

Figure S5. Two  $^1\text{H}$ - $^1\text{H}$  sections of a 3D  $^1\text{H}$ - $^{15}\text{N}$  NOESY-HSQC experiment (mixing time 120 ms), showing NOE cross-peaks involving the backbone amide protons of Ser 334 (left) and Ala 337 (right). A well defined NOE is observed between the backbone amide proton of Ser 334 and the side chain methyl protons of Ala 337, consistent with close proximity of S334 N and A337 C $\beta$  in the crystallographic models (interatomic distances 4.3-4.4 Å)

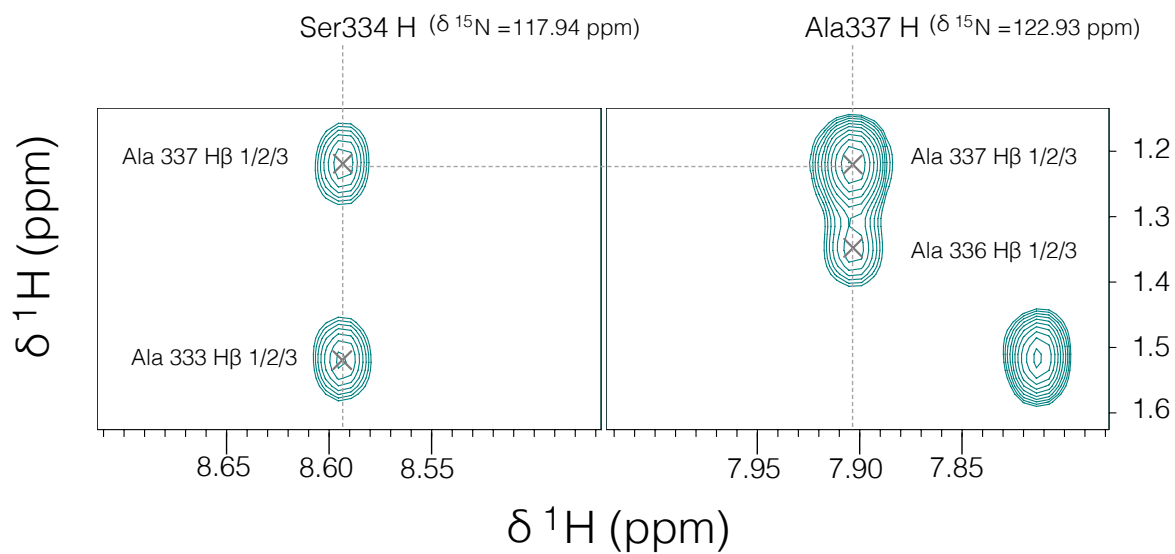

Table S1. Bacterial expression plasmids facilitating production of truncated MenV P proteins for biophysical analysis

| Protein                                   | Parental Vector | Cleavable Affinity Tag | Plasmid Name | Detail of insertion into the multiple cloning site of the vector                                                                                                                                                                                                                                                                                                                                                                                                                                                 |
|-------------------------------------------|-----------------|------------------------|--------------|------------------------------------------------------------------------------------------------------------------------------------------------------------------------------------------------------------------------------------------------------------------------------------------------------------------------------------------------------------------------------------------------------------------------------------------------------------------------------------------------------------------|
| <b>MenV P<sub>209-388</sub> (CC-L-BD)</b> | pET15b(+)       | polyhistidine          | pMW596       | <p><i>NcoI</i> <span style="float:right"><i>XhoI</i></span></p> <p>CC ATG GGC AGC AGC CAT CAT CAT CAT CAT CAC ACT AGT GAA AAC CTG TAT TTT CAG GCA AGC GCA ... GCA GCA CAG TAA <u>CTC GAG</u></p> <p>Met Gly Ser Ser His His His His His His Thr Ser Glu Asn Leu Tyr Phe Gln <b>Ala Ser Ala ... Ala Ala Gln</b> --- --- -</p> <p style="text-align:center">poly-histidine tag <span style="margin-left: 100px;">TEV recognition seq.</span> <span style="float:right"><b>209 210 211 386 387 388</b></span></p>   |
| <b>MenV P<sub>209-336</sub> (CC-L)</b>    | pET15b(+)       | polyhistidine          | pMW598       | As for plasmid pMW596, with a stop codon inserted into the MenV P coding sequence, following codon for Ala 336                                                                                                                                                                                                                                                                                                                                                                                                   |
| <b>MenV P<sub>209-271</sub> (CC)</b>      | pET15b(+)       | polyhistidine          | pMW597       | As for plasmid pMW596, with a stop codon inserted into the MenV P coding sequence, following codon for Ile 271                                                                                                                                                                                                                                                                                                                                                                                                   |
| <b>MenV P<sub>267-388</sub> (L-BD)</b>    | pET41a(+)       | GST                    | pMW591       | <p><i>GST</i> <span style="float:right"><i>XhoI</i></span></p> <p>... TCG GAT GGC AGT GAC TAC GAT ATC CCA ACT AGT GAA AAC CTG TAT TTT CAG ACC ACC ATC ... GCA GCA CAG TAA <u>CTC GAG</u></p> <p>... <b>Ser Asp</b> Gly Ser Asp Tyr Asp Ile Pro Thr Ser Glu Asn Leu Tyr Phe Gln <b>Thr Thr Ile ... Ala Ala Gln</b> --- --- ---</p> <p style="text-align:center">spacer sequence <span style="margin-left: 100px;">TEV recognition seq.</span> <span style="float:right"><b>267 268 269 386 387 388</b></span></p> |
| <b>MenV P<sub>267-328</sub> (L)</b>       | pET41a(+)       | GST                    | pMW652       | As for plasmid pMW591, with a stop codon inserted into the MenV P coding sequence, following codon for Gln 328                                                                                                                                                                                                                                                                                                                                                                                                   |
| <b>MenV P<sub>337-388</sub> (BD)</b>      | pET41a(+)       | GST                    | pKY302       | <p><i>GST</i> <span style="float:right"><i>XhoI</i></span></p> <p>... TCG GAT GGC AGT GAC TAC GAT ATC CCA ACT AGT GAA AAC CTG TAT TTT CAG GCC CTG AGC ... GCG GCG CAG TGA <u>CTC GAG</u></p> <p>... <b>Ser Asp</b> Gly Ser Asp Tyr Asp Ile Pro Thr Ser Glu Asn Leu Tyr Phe Gln <b>Ala Leu Ser ... Ala Ala Gln</b> --- --- ---</p> <p style="text-align:center">spacer sequence <span style="margin-left: 100px;">TEV recognition seq.</span> <span style="float:right"><b>337 338 339 386 387 388</b></span></p> |

The Men V P gene sequence (UniProt ID Q91MK1; Genbank Accession AF326114) was codon-optimized for expression in *E. coli*. To limit chemical reactivity of the protein, a Cys352Ser mutation was introduced into the P coding sequence using site-directed mutagenesis.



Table S2. Bacterial expression plasmids facilitating production of MBP-MenV P fusion proteins for crystallographic analysis.

| Protein                        | Parental Vector | Plasmid Name | Detail of insertion into the multiple cloning site of the vector                                                                                                                                                                                                                                                                                                                                                                                                              |
|--------------------------------|-----------------|--------------|-------------------------------------------------------------------------------------------------------------------------------------------------------------------------------------------------------------------------------------------------------------------------------------------------------------------------------------------------------------------------------------------------------------------------------------------------------------------------------|
| <b>MBP-P<sub>321-388</sub></b> | pMALX(A)        | pMW604       | <div> <div> <b>MBP</b><br/> GCG CAG ACT AAT <u>GCG GCC GCA</u><br/> Ala Gln Thr Asn Ala Ala Ala </div> <div> <i>NotI</i><br/> AGC CTG CCG ... GCA GCA CAG TAA <u>AAG CCT</u><br/> <b>Ser Leu Pro ... Ala Ala Gln</b><br/> 321 322 323 386 387 388 </div> <div> <b>MenV P protein</b><br/> GCG CAG AAA ... GCA GCA CAG TAA <u>AAG CCT</u><br/> <b>Ser Gln Lys ... Ala Ala Gln</b><br/> 327 328 329 386 387 388 </div> <div> <i>HindIII</i><br/> - - -<br/> - - - </div> </div> |
| <b>MBP-P<sub>327-388</sub></b> | pMALX(A)        | pMW605       | <div> <div> <b>MBP</b><br/> GCG CAG ACT AAT <u>GCG GCC GCA</u><br/> Ala Gln Thr Asn Ala Ala Ala </div> <div> <i>NotI</i><br/> AGC CAG AAA ... GCA GCA CAG TAA <u>AAG CCT</u><br/> <b>Ser Gln Lys ... Ala Ala Gln</b><br/> 327 328 329 386 387 388 </div> <div> <b>MenV P protein</b><br/> GCG CAG AAA ... GCA GCA CAG TAA <u>AAG CCT</u><br/> <b>Ser Gln Lys ... Ala Ala Gln</b><br/> 327 328 329 386 387 388 </div> <div> <i>HindIII</i><br/> - - -<br/> - - - </div> </div> |
| <b>MBP-P<sub>329-388</sub></b> | pMALX(A)        | pMW606       | <div> <div> <b>MBP</b><br/> GCG CAG ACT AAT <u>GCG GCC GCA</u><br/> Ala Gln Thr Asn Ala Ala Ala </div> <div> <i>NotI</i><br/> AAA AGC AGC ... GCA GCA CAG TAA <u>AAG CCT</u><br/> <b>Lys Ser Ser ... Ala Ala Gln</b><br/> 329 330 331 386 387 388 </div> <div> <b>MenV P protein</b><br/> GCG CAG AAA ... GCA GCA CAG TAA <u>AAG CCT</u><br/> <b>Ser Gln Lys ... Ala Ala Gln</b><br/> 327 328 329 386 387 388 </div> <div> <i>HindIII</i><br/> - - -<br/> - - - </div> </div> |
| <b>MBP-P<sub>330-388</sub></b> | pMALX(A)        | pMW607       | <div> <div> <b>MBP</b><br/> GCG CAG ACT AAT <u>GCG GCC GCA</u><br/> Ala Gln Thr Asn Ala Ala Ala </div> <div> <i>NotI</i><br/> AGC AGC GCA ... GCA GCA CAG TAA <u>AAG CCT</u><br/> <b>Ser Ser Ala ... Ala Ala Gln</b><br/> 330 331 332 386 387 388 </div> <div> <b>MenV P protein</b><br/> GCG CAG AAA ... GCA GCA CAG TAA <u>AAG CCT</u><br/> <b>Ser Gln Lys ... Ala Ala Gln</b><br/> 327 328 329 386 387 388 </div> <div> <i>HindIII</i><br/> - - -<br/> - - - </div> </div> |

The Men V P gene sequence (UniProt ID Q91MK1; Genbank Accession AF326114) was codon-optimized for expression in *E. coli*. To limit chemical reactivity of the protein a Cys352Ser mutation was introduced into the P coding sequence using site-directed mutagenesis.

Table S3. Media and Buffers used for Protein Purification

| Protein                              | Lysis Buffer                            | Affinity Media                        | Affinity Chromatography Wash and Elution Buffers                                                                                                   | Ion Exchange media       | Ion Exchange chromatography Buffers                    | Size Exclusion media  | Size Exclusion Chromatography Buffer    |
|--------------------------------------|-----------------------------------------|---------------------------------------|----------------------------------------------------------------------------------------------------------------------------------------------------|--------------------------|--------------------------------------------------------|-----------------------|-----------------------------------------|
| <b>P<sub>209-388</sub> (CC-L-BD)</b> | 12.5 mM MOPS/KOH pH 7.0<br>250 mM NaCl  | Talon Metal Affinity Resin [Clontech] | Wash: Lysis Buffer + 50 mM Imidazole<br>Elution: Lysis Buffer + 400 mM imidazole<br><br>Poly-histidine tag cleaved post-elution with TEV protease. | SP Sepharose HP [Cytiva] | 12.5 mM MOPS/KOH pH 7.0<br>1mM EDTA<br>50-1000 mM NaCl | Superdex 200 [Cytiva] | 12.5 mM MOPS/KOH pH 7.0<br>250 mM NaCl  |
| <b>P<sub>267-388</sub> (L-BD)</b>    | 12.5 mM MOPS/KOH pH 7.0<br>150 mM NaCl  | Glutathione Sepharose 4B [Cytiva]     | Wash: Lysis Buffer<br>Elution: Lysis Buffer (following on-column cleavage of GST fusion protein with TEV protease)                                 | SP Sepharose HP [Cytiva] | 12.5 mM MOPS/KOH pH 7.0<br>50-1000 mM NaCl             | Superdex 75 [Cytiva]  | 12.5 mM MOPS/KOH pH 7.0<br>150 mM NaCl  |
| <b>P<sub>267-328</sub> (L)</b>       | 12.5 mM Tris/ HCl pH 8.5<br>150 MM NaCl | Glutathione Sepharose 4B [Cytiva]     | Wash: Lysis Buffer<br>Elution: Lysis Buffer (following on-column cleavage of GST fusion protein with TEV protease)                                 | Q Sepharose HP [Cytiva]  | 12.5 mM Tris/HCl pH 8.5<br>50-1000 mM NaCl             | Superdex 75 [Cytiva]  | 12.5 mM Tris/ HCl pH 8.5<br>150 mM NaCl |
| <b>P<sub>337-388</sub> (BD)</b>      | 12.5 mM MOPS/KOH pH 7.0<br>150 mM NaCl  | Glutathione Sepharose 4B [Cytiva]     | Wash: Lysis Buffer<br>Elution: Lysis Buffer (following on-column cleavage of GST fusion protein with TEV protease)                                 | SP Sepharose HP [Cytiva] | 12.5 mM Malic acid/KOH pH 3.7<br>50-1000 mM NaCl       | Superdex 75 [Cytiva]  | 12.5 mM MOPS/KOH pH 7.0<br>150 mM NaCl  |
| <b>MBP-P<sub>329-388</sub></b>       | 12.5 mM Tris/ HCl pH 8.5<br>150 MM NaCl | Amylose Resin [NEB]                   | Wash: Lysis Buffer<br>Elution: Lysis Buffer + 40 mM Maltose                                                                                        | Q Sepharose HP [Cytiva]  | 12.5 mM Tris/ HCl pH 8.5<br>50-1000 mM NaCl            | Superdex 75 [Cytiva]  | 12.5 mM Tris/ HCl pH 8.5<br>150 MM NaCl |

Table S4.  $^3J_{\text{HN-H}\alpha}$  coupling constants for L-BD (10 °C, pH 7.0) estimated using the ARTSY-J pulse sequence.

| <b>residue</b> | <b><math>^3J_{\text{HN-H}\alpha}</math></b> | <b>error</b> | <b>residue</b> | <b><math>^3J_{\text{HN-H}\alpha}</math></b> | <b>error</b> | <b>residue</b> | <b><math>^3J_{\text{HN-H}\alpha}</math></b> | <b>error</b> |
|----------------|---------------------------------------------|--------------|----------------|---------------------------------------------|--------------|----------------|---------------------------------------------|--------------|
| <b>269</b>     | 9.57                                        | 0.02         | <b>311</b>     | 7.23                                        | 0.02         | <b>353</b>     | 8.77                                        | 0.10         |
| <b>270</b>     | 7.24                                        | 0.02         | <b>312</b>     | 6.74                                        | 0.03         | <b>355</b>     | 6.03                                        | 0.13         |
| <b>271</b>     | 7.63                                        | 0.02         | <b>313</b>     | 8.24                                        | 0.03         | <b>357</b>     | 4.45                                        | 0.15         |
| <b>272</b>     | 7.17                                        | 0.02         | <b>314</b>     | 6.52                                        | 0.03         | <b>359</b>     | 2.72                                        | 0.42         |
| <b>273</b>     | 6.44                                        | 0.02         | <b>315</b>     | 6.36                                        | 0.03         | <b>360</b>     | 3.05                                        | 0.23         |
| <b>275</b>     | 7.30                                        | 0.02         | <b>316</b>     | 5.54                                        | 0.04         | <b>361</b>     | 4.00                                        | 0.18         |
| <b>276</b>     | 7.45                                        | 0.02         | <b>317</b>     | 6.95                                        | 0.03         | <b>362</b>     | 4.86                                        | 0.19         |
| <b>277</b>     | 7.49                                        | 0.03         | <b>318</b>     | 6.08                                        | 0.03         | <b>363</b>     | 3.68                                        | 0.37         |
| <b>278</b>     | 6.94                                        | 0.02         | <b>319</b>     | 6.72                                        | 0.03         | <b>364</b>     | 4.43                                        | 0.17         |
| <b>279</b>     | 7.45                                        | 0.04         | <b>321</b>     | 7.11                                        | 0.05         | <b>365</b>     | 5.13                                        | 0.23         |
| <b>280</b>     | 5.80                                        | 0.03         | <b>322</b>     | 6.78                                        | 0.04         | <b>367</b>     | 8.19                                        | 0.15         |
| <b>281</b>     | 7.00                                        | 0.03         | <b>324</b>     | 6.70                                        | 0.05         | <b>368</b>     | 5.97                                        | 0.23         |
| <b>282</b>     | 5.50                                        | 0.04         | <b>325</b>     | 7.23                                        | 0.08         | <b>369</b>     | 4.28                                        | 0.27         |
| <b>283</b>     | 5.28                                        | 0.04         | <b>326</b>     | 6.30                                        | 0.15         | <b>370</b>     | 8.86                                        | 0.47         |
| <b>284</b>     | 6.58                                        | 0.04         | <b>328</b>     | 6.94                                        | 0.42         | <b>371</b>     | 5.94                                        | 0.25         |
| <b>285</b>     | 6.48                                        | 0.07         | <b>329</b>     | 6.26                                        | 0.19         | <b>373</b>     | 4.71                                        | 0.18         |
| <b>286</b>     | 6.90                                        | 0.08         | <b>330</b>     | 7.04                                        | 0.27         | <b>374</b>     | 3.34                                        | 0.25         |
| <b>287</b>     | 6.32                                        | 0.04         | <b>331</b>     | 7.29                                        | 0.72         | <b>375</b>     | 2.54                                        | 0.83         |
| <b>288</b>     | 7.18                                        | 0.03         | <b>332</b>     | 7.34                                        | 0.02         | <b>377</b>     | 4.07                                        | 0.21         |
| <b>289</b>     | 7.17                                        | 0.03         | <b>333</b>     | 5.76                                        | 0.10         | <b>378</b>     | 5.14                                        | 0.23         |
| <b>290</b>     | 7.04                                        | 0.04         | <b>334</b>     | 5.05                                        | 0.11         | <b>380</b>     | 3.86                                        | 0.29         |
| <b>291</b>     | 6.25                                        | 0.03         | <b>336</b>     | 4.36                                        | 0.32         | <b>381</b>     | 4.76                                        | 0.21         |
| <b>292</b>     | 5.56                                        | 0.03         | <b>337</b>     | 4.83                                        | 0.19         | <b>383</b>     | 3.67                                        | 0.46         |
| <b>294</b>     | 6.20                                        | 0.06         | <b>338</b>     | 3.52                                        | 0.28         | <b>384</b>     | 4.23                                        | 0.18         |
| <b>295</b>     | 7.28                                        | 0.02         | <b>339</b>     | 3.30                                        | 0.20         | <b>385</b>     | 5.20                                        | 0.15         |
| <b>296</b>     | 7.69                                        | 0.02         | <b>340</b>     | 6.89                                        | 0.18         | <b>386</b>     | 4.71                                        | 0.10         |
| <b>297</b>     | 7.11                                        | 0.04         | <b>341</b>     | 2.94                                        | 0.30         | <b>387</b>     | 6.42                                        | 0.04         |
| <b>298</b>     | 7.63                                        | 0.03         | <b>342</b>     | 3.13                                        | 0.41         | <b>388</b>     | 7.63                                        | 0.02         |
| <b>300</b>     | 7.47                                        | 0.02         | <b>343</b>     | 3.39                                        | 0.28         |                |                                             |              |
| <b>301</b>     | 7.23                                        | 0.02         | <b>344</b>     | 2.77                                        | 0.38         |                |                                             |              |
| <b>302</b>     | 6.47                                        | 0.04         | <b>345</b>     | 4.73                                        | 0.37         |                |                                             |              |
| <b>303</b>     | 7.09                                        | 0.02         | <b>346</b>     | 2.90                                        | 0.53         |                |                                             |              |
| <b>304</b>     | 7.43                                        | 0.02         | <b>347</b>     | 4.47                                        | 0.17         |                |                                             |              |
| <b>306</b>     | 7.25                                        | 0.03         | <b>348</b>     | 3.47                                        | 0.31         |                |                                             |              |
| <b>307</b>     | 7.83                                        | 0.03         | <b>349</b>     | 2.33                                        | 0.93         |                |                                             |              |
| <b>308</b>     | 6.46                                        | 0.03         | <b>350</b>     | 3.05                                        | 0.33         |                |                                             |              |
| <b>309</b>     | 5.13                                        | 0.03         | <b>351</b>     | 5.34                                        | 0.15         |                |                                             |              |
| <b>310</b>     | 6.87                                        | 0.02         | <b>352</b>     | 8.32                                        | 0.15         |                |                                             |              |

Severe line broadening in the dephased spectrum prevented estimation of  $^3J_{\text{HN-H}\alpha}$  for some non-proline residues.
